# Supplementary material
Source: PubMed Central journal article supplement (PMC3898037)

**Figure 2 (online supplemental material).** Percentage of the population with  $\geq 2$  cardiovascular risk factors stratified by age category and sex

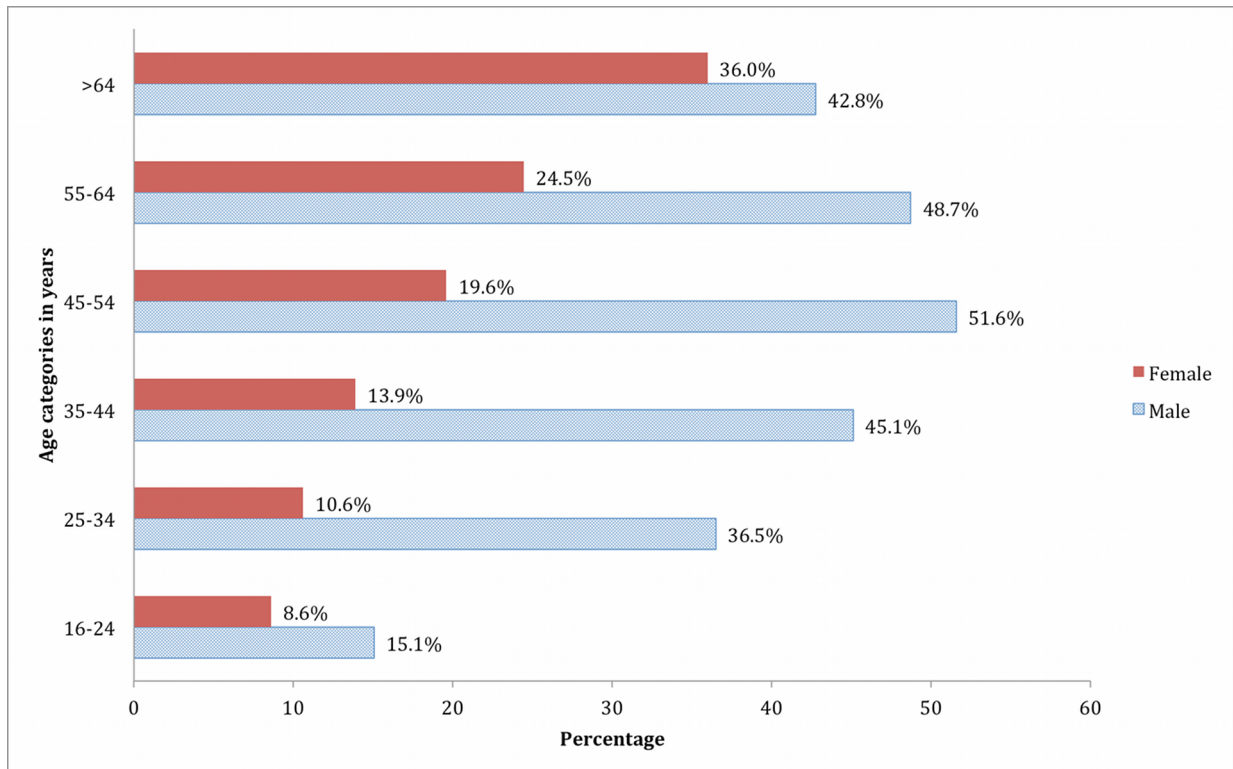

Supplement: NIHMS543696-supplement-supplement_1.pdf [file NIHMS543696-supplement-supplement_1.pdf]
